# Supplementary material
Source: publisher site journal article supplement (https://www.dovepress.com/article/346978)
Supplement: Supplementary file 1 [file get_supplementary_file.php]

## Supplemental material

### R Session log

```
## R version 4.1.2 (2021-11-01)
## Platform: x86_64-apple-darwin17.0 (64-bit)
## Running under: macOS Big Sur 10.16
Matrix products: default

## BLAS: /Library/Frameworks/R.framework/Versions/4.1/Resources/lib/libRblas.0.
dylib
## LAPACK: /Library/Frameworks/R.framework/Versions/4.1/Resources/lib/libRlapac
k.dylib
##
## locale:
## [1] en_US.UTF-8/en_US.UTF-8/en_US.UTF-8/C/en_US.UTF-8/en_US.UTF-8
##
## attached base packages:
## [1] stats graphics grDevices utils datasets methods base
##
## other attached packages:
## [1] pROC_1.18.0 qwraps2_0.5.2 forcats_0.5.1 stringr_1.4.0
## [5] dplyr_1.0.7 purrr_0.3.4 readr_2.1.1 tidyr_1.1.4
## [9] tibble_3.1.6 tidyverse_1.3.1 cowplot_1.1.1 ggpubr_0.4.0
## [13] ggplot2_3.3.5
##
## loaded via a namespace (and not attached):
## [1] Rcpp_1.0.7 svglite_2.0.0 lubridate_1.8.0 assertthat_0.2.1
## [5] digest_0.6.29 utf8_1.2.2 plyr_1.8.6 R6_2.5.1
```

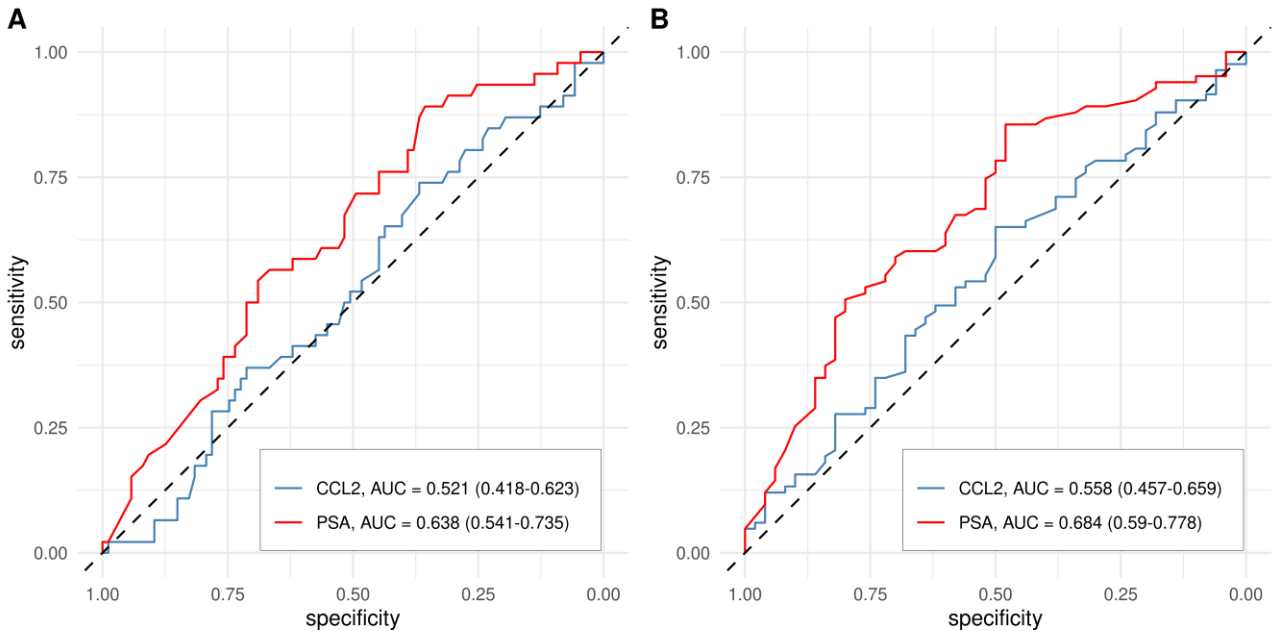

|                       | Non-significant Cancer<br>(n=87) | Significant<br>Cancer<br>(n = 46) | Median of the Difference<br>95%<br>CI | p-value  |
|-----------------------|----------------------------------|-----------------------------------|---------------------------------------|----------|
| Median PSA,<br>ng/ml  | 7.0                              | 8.4                               | 1.4 [0.3,2.6]                         | 0.00913* |
| Median CCL2,<br>pg/ml | 130.8                            | 133.0                             | 2.2 [-10.6,14.4]                      | 0.698    |

  

|                    | Neg. biopsy (n = 50) | Cancer (n = 83) | Median of the Difference<br>95% CI | p-value   |
|--------------------|----------------------|-----------------|------------------------------------|-----------|
| Median PSA, ng/ml  | 6.2                  | 8.2             | 1.8 [0.8,2.9]                      | 0.000389* |
| Median CCL2, pg/ml | 126.5                | 134             | 6.6 [-5.2,18.4]                    | 0.262     |

### Supplementary Figure 1 CCL2 & PSA levels ROC

A: PSA and CCL2 receiver operating characteristic curve for significant cancer versus Gleason Score 6 (3+3) or negative biopsies and ability to predict significant cancer, B: as above with any cancer compared to negative biopsies. Wilcoxon nonparametric test was used for two-group comparison, p-values < 0.05 were considered significant (\*). Confidence bands for area under the curve (AUC) for receiver operating characteristic (ROC) curves were compared using DeLong's nonparametric approach.
